# Supplementary material for: Changes in the Human Gut Microbiome during Dietary Supplementation with Modified Rice Bran Arabinoxylan Compound
Source: Preprints.org preprint supplement (doi:10.20944/preprints202306.0053.v1), 2023-06-01

## Supplementary S1

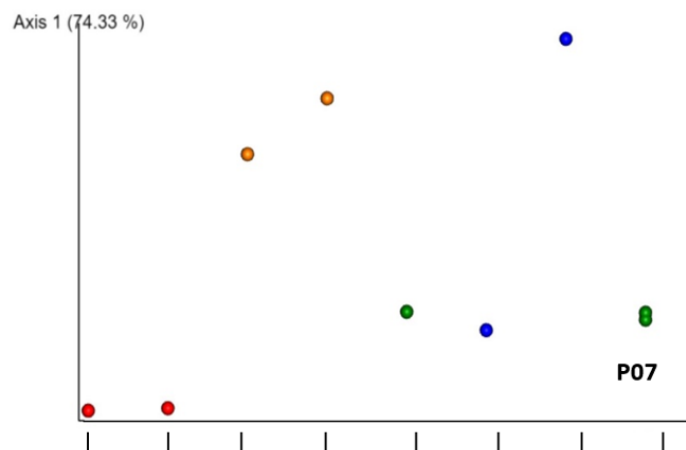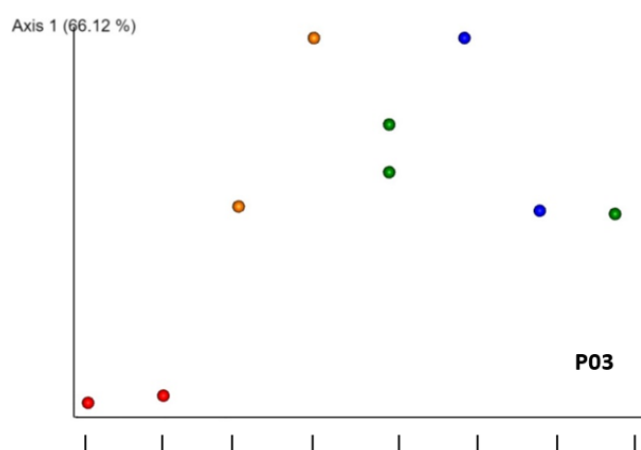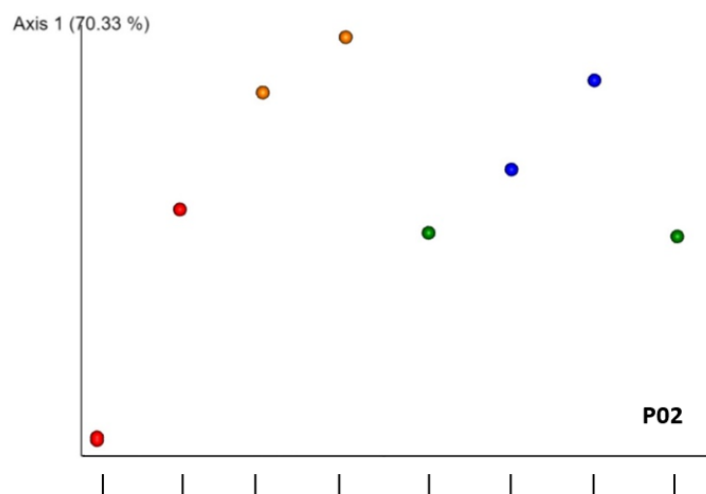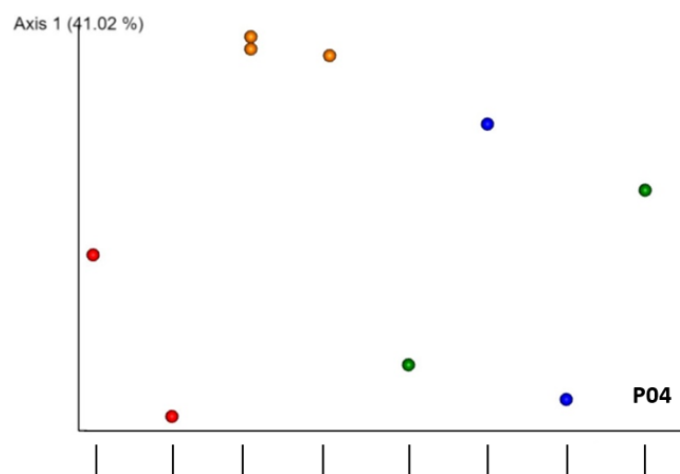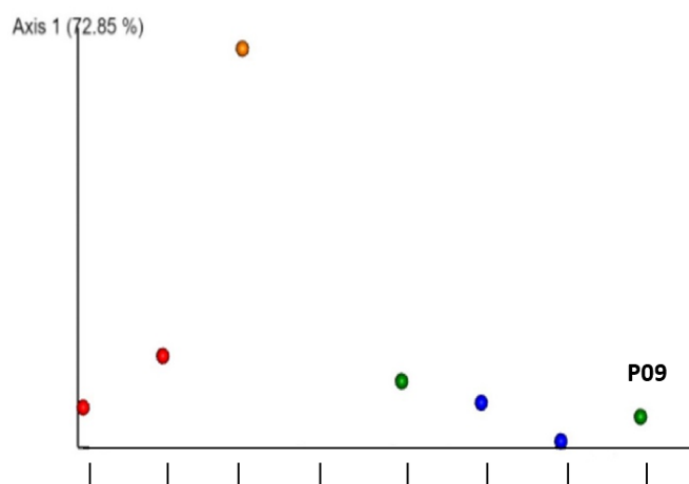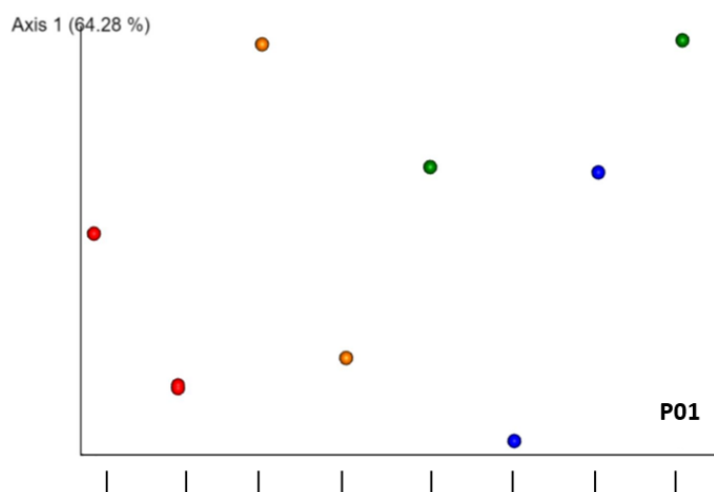

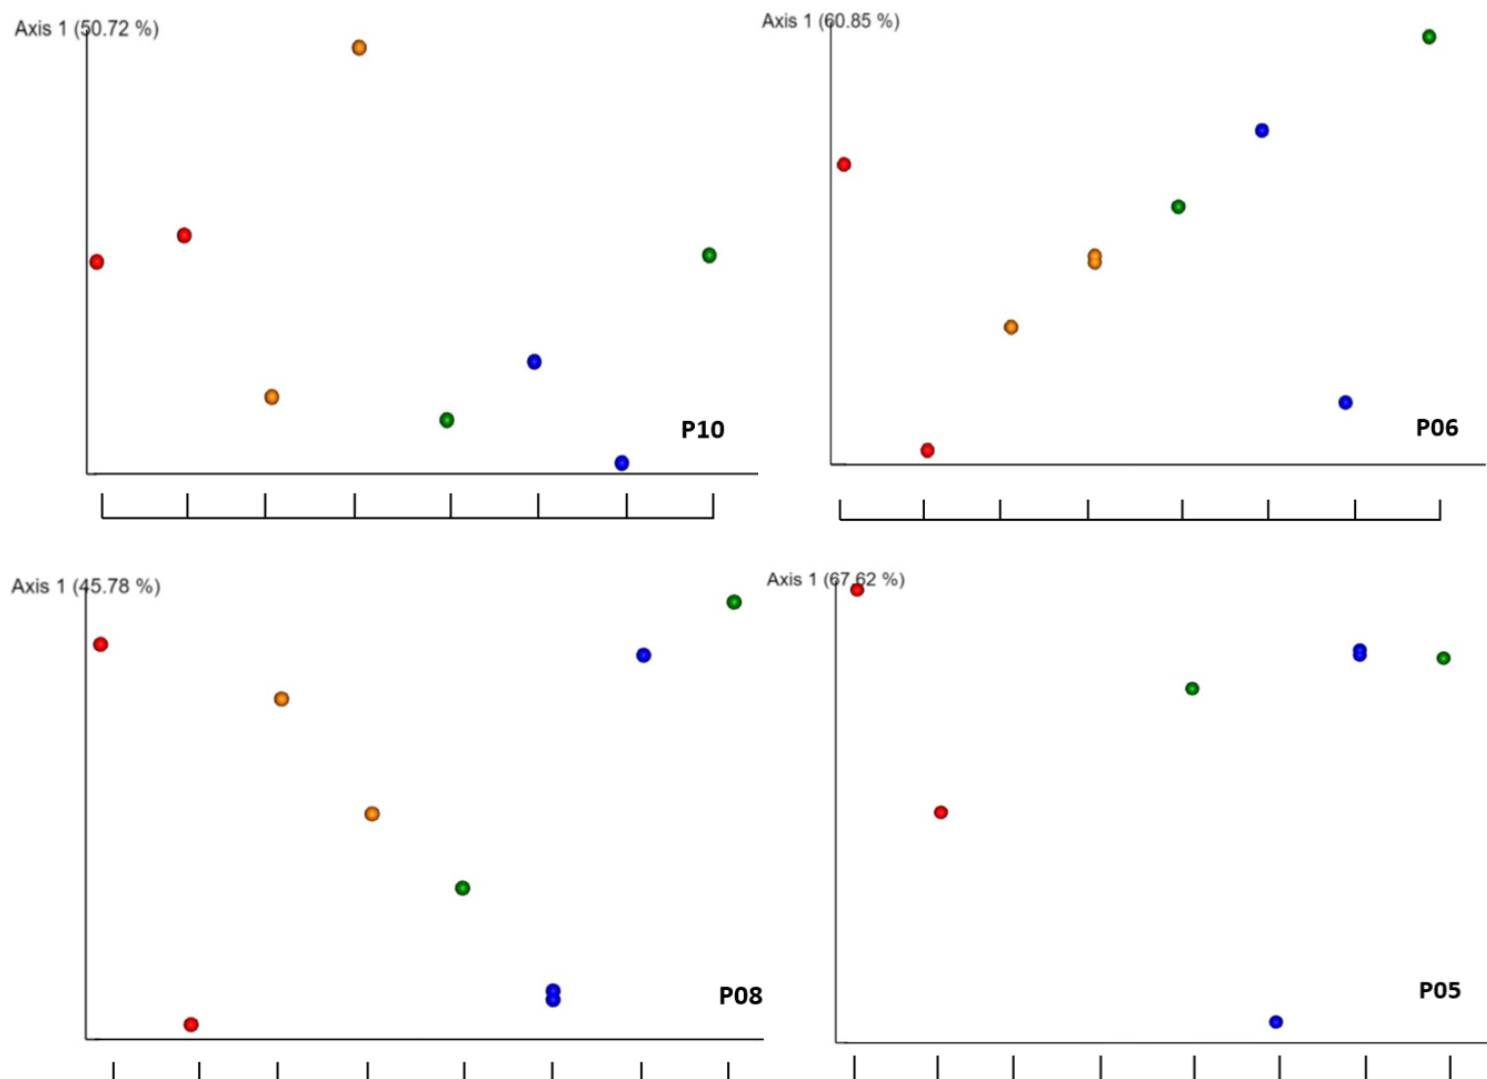

**Figure S1:** EMPeRor plots of weighted unifrac beta diversity distance matrix of each participant. Axis 1 indicates the percentage of variation of the total variance between samples (alteration of microbial composition) and X-axis indicates days since experimental phase began, depicting time points 1-8. Distance on Y-axis indicates similarity of samples. Each interventional phase has a total of 2 time points except washout and post-intervention which have 1 time point each. Multiple samples on the same time point indicate a technical replicate and missing samples are not depicted.

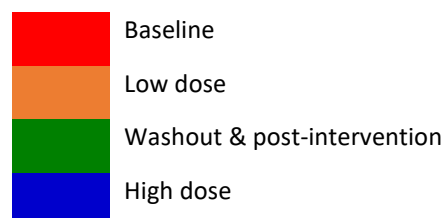

Supplement: Supplementary file 1 [file supplementary]
